# Supplementary material
Source: HighWire-hosted journal article supplement (https://thorax.bmj.com/content/76/3/292)

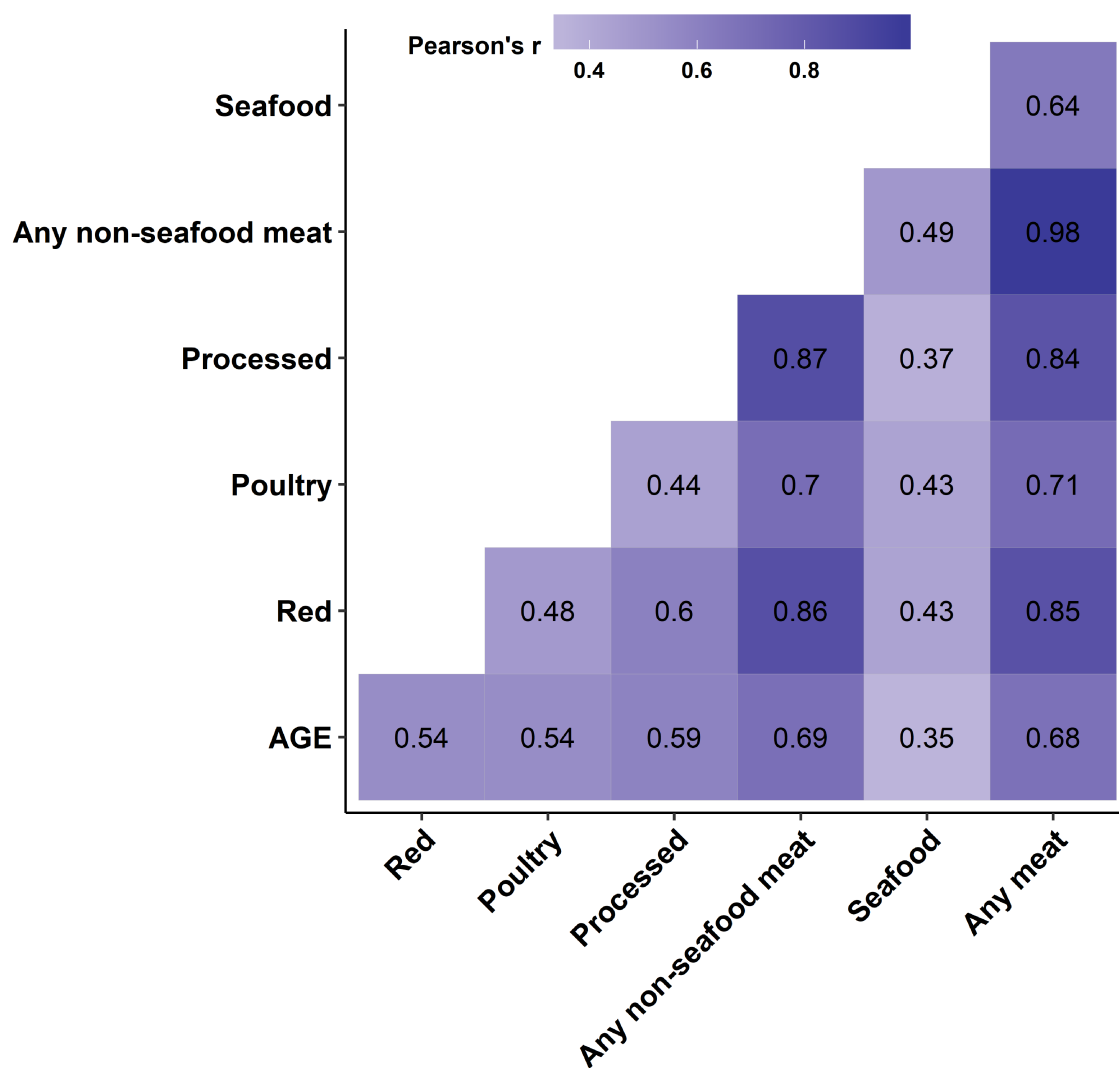

Supplement: inline-supplementary-material-4 [file inline-supplementary-material-4.pdf]
